# 1 The Impact Of Long-term Grazing Intensity On Functional 2 Groups Richness, Biomass, And Species Diversity In an Inner 3 Mongolian Steppe Grassland

4  
5 Yousif Mohamed Zainelabdeen<sup>1 2#</sup>, Ahmed Ibrahim Ahmed<sup>1 2 #</sup>, Ruirui Yan<sup>1\*</sup>,  
6 Xiaoping Xin<sup>1\*</sup>, Cao Juan<sup>1</sup>, Jimoh Saheed Olaide<sup>3</sup>

7  
8 <sup>1</sup> *Laboratory of Grassland Science, Institute of Agricultural Resources and Regional Planning, Chinese  
9 Academy of Agricultural Sciences, Beijing 100081, China*

10 <sup>2</sup> *Agricultural Research Corporations (ARC), Wad Medani 126, Sudan*

11 <sup>3</sup> *Grassland Research Institute, Chinese Academy of Agricultural Sciences, Hohhot 010010, China*

12 *\*Corresponding author at 12 Zhongguancun South Street, Beijing 100081, China. E-mail addresses:  
13 yanruirui@caas.cn(R. Yan), xinxiaoping@caas.cn (X. Xin).*

14 *#The first three authors contributed equally to this work and can be considered co-first authors.*

## 15 Abstract

16 Livestock grazing is one of the major land uses, causing changes in the plant community's structure and  
17 grasslands composition. We assessed the effect of grazing intensity on aboveground biomass, species richness, and  
18 plant functional group (PFG) diversity in a temperate meadow steppe in Hulunbuir in northern China, involving 78  
19 plant species from eight functional groups. Four grazing intensity classes were characterized, including light,  
20 moderate, heavy, and no grazing, based on stocking rates of 0.23, 0.46, 0.92, and 0.00 animal units per hectare. Our  
21 results show that the richness of short species, including perennial short grass, perennial short grass, and legume  
22 increased under light to moderate grazing, while no effect of grazing was observed on the richness of shrubs. With  
23 increasing grazing intensity, the aboveground biomass of perennial tall grasses and perennial tall forbs decreased  
24 significantly, while that of annual/biennial plant functional groups increased. The community diversity and evenness  
25 of annual/biennial plants increased significantly with grazing intensity. We concluded that heavy grazing has negative  
26 impacts on plant functional group richness and aboveground biomass.

27 **Keywords:** Functional group; species richness; biomass; diversity; grazing intensity

## 28 Introduction

29 Livestock grazing is considered one of the primary biotic factors that affect the natural grassland  
30 ecosystem functions (Olf and Ritchie 1998). Specifically, species diversity response to grazing intensity  
31 varies from location to location (De Bello, et al. 2006). This suggests that the magnitude of grazing intensity

32 has the potential to impact species diversity, which often leads to vegetation degradation (Bakker 1998).  
33 Previous studies have shown that the positive impact of grazing intensity in natural grasslands implies that  
34 historical traditional grazing does not have a negative impact on these ecosystems (Montalvo, et al. 1993;  
35 Verdú, et al. 2007). For example, (Proulx and Mazumder 1998) reported that species richness responds  
36 positively to heavy grazing intensity in a highly productive environment. It is noteworthy, however, that  
37 grazing intensity is a complex disturbance that can affect the grassland communities, both directly and  
38 indirectly (Papanikolaou, et al. 2011), because it has the potential to change the vegetation structure, growth,  
39 and composition of different species, while also affecting the abiotic components of the ecosystem (Facelli  
40 and Springbett 2009). Whereas changes in grassland species composition and richness are induced by  
41 grazing intensity (Bergmeier, et al. 2003; Suding, et al. 2008), the influence of the latter on plant functional  
42 groups at the species level could differ (DÍAz, et al. 2007; Díaz, et al. 2001; McIntyre, et al. 1999; Noy-  
43 Meir, et al. 1989). However, these results were often inconsistent, more research is needed to improve our  
44 understanding of how grazing intensities affects species and plant communities (e.g., the species in the  
45 same plant functional group can respond differently to grazing intensity due to palatability or species  
46 structure), especially in Hulunbuir grasslands (Foggin 2008; Le, et al. 2014).

47 The disturbance caused by large herbivore grazing on plant functional groups' life is an important  
48 factor affecting plant community composition. In some environments, the composition and structure of  
49 plant and animal species are influenced by grazing intensities, while in other places, the environmental  
50 characteristics of the area, including weather conditions and climate, are sometimes more important.  
51 Grazing directly influences plant community composition through the physical removal of plant parts. It  
52 can also indirectly influence plant communities by organizing ecosystem productivity or changing nutrient  
53 patterns between plants of different sizes. Therefore, grazing can change the quantity, diversity, and  
54 distribution of organisms in the ecosystem. Grazing intensities also influence grass species performance  
55 and grassland environment (Saccone, et al. 2014)

56 Biodiversity is a complex concept that allows for a variety of possible definitions. In a broad sense,  
57 from species to various forms of life, are defined as ecosystems (Hill 1973; Wilson, et al. 2016). At the  
58 community level, the diversity index reflects the distribution of the basic plant species in an environment.  
59 However, the term 'diversity index' could also be used to depict other categorizations such as functional  
60 groups and genetic types within the ecological environment. The entities of interest are usually individual  
61 animals or plants, where individual species, biomass, or coverage can be used as a measure of abundance  
62 (Dumont, et al. 2009; Fanselow, et al. 2011) It has been reported that grazing intensities had different  
63 impacts on single species' aboveground biomass and biodiversity, which is documented by significant  
64 effects of grazing intensity on biomass and species diversity for this study.

65 Diversity can be divided into three parts:  $\alpha$  diversity, which is the richness of a single site or specific  
66 community;  $\beta$  diversity, which is the difference of flora between different sites or communities; and  $\gamma$   
67 diversity, which is the difference between geographical regions (Sepkoski Jr 1988).  $\alpha$  diversity measures  
68 the aggregation within the community and reflects the fine division of ecological resources by species,  
69 while  $\beta$  diversity can be used to measure the degree of species composition turnover in the environmental  
70 gradient, potentially reflecting the degree of habitat selection or allotment. Gamma and beta diversities are  
71 similar, although gamma is measured at a larger spatial scale; it reflects the locality or degree of locality of  
72 a biota. (Whittaker and Rh 1977) retained the term "gamma diversity" for the combination of alpha and  
73 beta diversity, which he also called "complete diversity" (Whittaker 1972).

74 Palatability refers to the characteristic or condition of plant stimulating animal selective response, also  
75 defined as a pleasant taste. Preference can be expressed in the relative of time that animals graze different  
76 species. Preferences were left to animals to choose from, basically behavioral. Relative preference refers to  
77 the proportion choice between two or more species. In addition to palatability, many other factors affect  
78 food selection (Heady 1964).

79 Broadly, the objective of this study was to understand how different grazing intensities influence  
80 species richness, diversity and plant functional groups in the Hulunbuir meadow steppe ecosystem. Our  
81 goal was to determine the effect of grazing intensity on aboveground biomass and species richness based  
82 on species palatability. We hypothesized that perennial tall grasses are more palatable than other functional  
83 groups (e.g., shrubs are spiny, and Liliaceae are often poisonous). Plant functional groups are greatly used  
84 in community ecology and earth system simulation to describe the changes in plant characteristics within  
85 and between communities. However, this approach assumes that functional groups can account for a large  
86 proportion of variation in traits among species. Therefore, the use of functional groups is essentially a trait-  
87 based approach. Plant species in functional groups have similar characteristics and ecological similarity  
88 (Thomas, et al. 2019).

89 Furthermore, we evaluated the response of plant functional groups (PFGs) diversity to grazing intensity.  
90 Here, we hypothesize that the diversity of functional groups differs across grazing intensities. To clarify,  
91 species diversity implies a measure of both species number and abundance while species richness is just  
92 the number of plant species found in an environment.

## 93 Materials And Methods

### 94 Study area

95 The research was conducted in the Hulunbuir meadow steppe in northeast Inner Mongolia of China.  
96 The Hulunbuir meadow steppe has an area of  $7.86 \times 10^4$  square kilometers (Figure 1).

97 The mean maximum temperature in Hulunbuir is measured at 36.17 °C in July, and a minimum  
98 temperature of -48.5 °C in January. The annual frost-free period ranges from 85 to 155 days. Sunshine  
99 duration accounts for 2650-3000 hours per year. The area receives an average annual precipitation of 350  
100 to 400 mm, 80% of which falls between July and September. Chernozem soils are commonly found here.  
101 The most dominant grass species in Hulunbuir are *Leymus chinensis*, *Carex duriuscula*, *Pulsatilla*  
102 *turczaninowii*, *Stipa baicalensis*, *Cleistogenes squarrosa*, *Artemisia tanacetifolia* and *Thalictrum squarrosom*.  
103

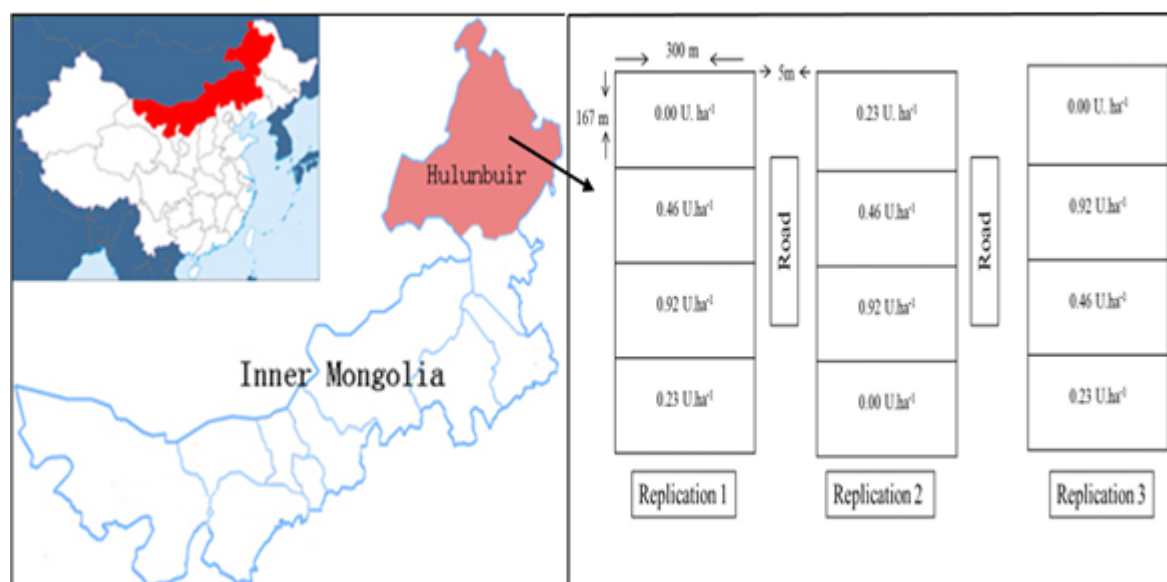

104  
105 **Fig.1.** The geographical location of the Hulunbuir meadow steppe.

### 106 *Experimental Layout*

107  
108 The experiment was carried out on 600 hectares of natural grassland, with three grazing intensities and  
109 a no-grazing control (NG). The grazing intensities were 0, 0.23, 0.46, and 0.92 animal unit (AU) ha<sup>-1</sup> for  
110 NG, light grazing (LG), moderate grazing (MG), and heavy grazing (HG), respectively. A 500 kg adult  
111 cattle is defined as 1 AU. The NG plot has been fenced and excluded from grazing since 2014. Each  
112 treatment plot occupies 5 ha of grassland with three replicates. In total, 12 plots were randomly distributed.  
113 The experiments were conducted during the grazing seasons (June to October) in 2014-2017. Drinking  
114 water was provided from an external source for the animals. The numbers of animals grazed in each of the  
115 experimental plot was 0, 2, 4 and 8 heads of 250-300 kg calves for the treatment of NG, LG, MG and HG,  
116 respectively.

117 In each treatment plot, five sampling quadrats of 1 m<sup>2</sup> were randomly located. Plants in each quadrat  
118 were trimmed to 2.5 cm in height. We divided the harvested species parts trimmed off into eight PFGs:  
119 perennial tall grass, perennial short grass, shrubs, legumes, Liliaceae herbs, annual/biennial plants,

120 perennial tall forbs, and perennial short forbs (Ma, et al. 2010). Based on our sampling records, we estimated  
121 the species richness. To explore potential compositional changes related to grazing intensity, we also  
122 estimated the diversity index of each PFG, defined as the ratio of the rate of the abundance of species  
123 belonging to a particular functional group to the rate of occurrence of all the species captured in each quadrat.

124 The following formulas were used to calculate alpha diversity (Shannon–Wiener diversity index (H)),  
125 the Beta diversity index ( $\beta$ ), Pielou evenness index (E), and important value (IV).

126 1-  $H (\alpha) = - \sum (P_i * \ln P_i)$  where, H = the Shannon diversity index,  $P_i$  = Number of  
127 individuals of species i/total number of species

128 2-  $\beta = \gamma - \alpha$ , where  $\beta$ = beta diversity,  $\gamma$ = Gamma diversity,  $\alpha$ = alpha diversity

129 3-  $E = - \sum (P_i * \ln P_i) / \ln S$  (Yan and Lu 2015)

130

131 4-  $IV = \frac{RC + RD + RB}{3}$

132 where RC is the relative coverage of the total species, RD is the relative density and RB is the  
133 relative biomass. Gamma diversity, also known as site diversity, is the total species richness of a  
134 site (Zhang, et al. 2014).

### 135 *Data analysis*

136 We used a one-way analysis of variance (ANOVA) to examine the changes in species richness  
137 and diversity of each PFGs (all plant species) across the grazing intensity treatments using the SAS  
138 9.2 (SAS, 2007). Duncan's multiple comparison test was used to compute the significant difference  
139 among the treatments at  $p < 0.05$ . Similarly, for each replication, the difference in the composition  
140 of the dominant species and the 8 PFGs was tested by ANOVA.

## 141 **Results**

### 142 *Grazing impact on species richness*

143 The species richness of the PFGs as influenced by grazing intensity were summarized in Table 1. A  
144 significant difference ( $p < 0.05$ ) was observed between the treatments for perennial short grass (PSG),  
145 perennial tall forbs (PTF) and Liliaceae herb (LILY). Perennial short grass species were higher in the LG  
146 and MG plots (Table 1). With an increase in grazing intensity, species richness of PSG decreased under HG  
147 but recorded a significantly similar value with the NG treatment. The species richness of PTFs and LILY  
148 was higher at sampling plots subjected to light and moderate grazing, as well as the NG treatment. Further,  
149 heavy grazing reduced the richness of these species (Table 1).

150  
151  
152  
153  
154  
155  
156  
157  
158  
159

**Table 1.** Species richness of plant functional groups under four grazing intensities.

| Functional groups | Total richness | Species | NG       | LG        | MG       | HG       |
|-------------------|----------------|---------|----------|-----------|----------|----------|
| PTG               | 14             |         | 3.8±0.6  | 3.6±0.1   | 3.4±0.2  | 2.7±0.3  |
| PSG               | 17             |         | 3.6±0.4b | 4.9±0.3a  | 5±0.14a  | 3.6±0.1b |
| PTF               | 23             |         | 8.1±0.5a | 1.1±0.1a  | 8.4±0.3a | 5.8±0.1b |
| PSF               | 27             |         | 6.5±4.4  | 6.5±0.3   | 7.2±0.1  | 6.7±0.4  |
| LILY              | 16             |         | 4.3±0.6a | 4.6±0.44a | 3.8±0.1a | 3.3±0.5b |
| LEGU              | 10             |         | 2.5±0.4  | 2.8±0.4   | 2.3±0.4  | 2.1±0.3  |
| ABP               | 5              |         | 0.91±0.4 | 1.4±0.5   | 1.2±0.1  | 1.2±0.1  |
| SHR               | 8              |         | 0.9±0.08 | 4.4±1.2   | 1.3±0.1  | 1.1±0.1  |
| Total             | 120            |         |          |           |          |          |

160 <sup>a,b,c</sup>Means in the same row with different superscript are significantly different. NG: No grazing, LG: Light grazing, MG: Moderate  
161 grazing, HG: Heavy grazing. PTG= Perennial tall grass, PSG= Perennial short grass, PTF= Perennial tall forbs, PSF= Perennial  
162 short forbs, LILY= Liliaceae herb, LEGU= legumes, ABP= annual/biennial plants and SHR= shrubs.

163 *Response of plant functional groups' aboveground biomass to grazing intensity*

164 The aboveground biomass differed significantly ( $p < 0.05$ ) among the grazing intensities (Table 2). The  
165 NG plot had the highest PTG (102.0 g/m<sup>2</sup>) biomass while the least was recorded for MG (21.0 g/m<sup>2</sup>) and  
166 HG (4.0 g/m<sup>2</sup>) plots. Similarly, PTF (47.4) and LILY herbs (14.7) biomasses were higher in the NG plot  
167 and the lowest was recorded in the HG (10.9 and 0.98 g/m<sup>2</sup>) plot. The ABP functional group strongly  
168 increased in the HG intensity plot (2.2) while the NG (0.7) and MG (0.43) intensity plots recorded similar  
169 lower values. All the grazing intensity plots had higher SHR biomass than the NG plot. However, there  
170 were no significant differences ( $p > 0.05$ ) in perennial short forbs (PSG), PSF, and LEGU biomass across  
171 the grazing treatments imposed.

172

173  
174  
175  
176  
177  
178  
179  
180  
181  
182  
183  
184  
185  
186  
187  
188  
189  
190  
191

**Table 2.** Responses of aboveground biomass g/m<sup>2</sup> of different plant functional groups to gradients of grazing intensity. Mean values and ( $\pm$  SE) for each group of plots for different plant functional groups

| Functional groups | Species number | NG                | LG               | MG               | HG               |
|-------------------|----------------|-------------------|------------------|------------------|------------------|
| PTG               | 6              | 102.0 $\pm$ 12.9a | 54.6 $\pm$ 6.1b  | 21.0 $\pm$ 2.9c  | 4.0 $\pm$ 1.1c   |
| PSG               | 7              | 26.3 $\pm$ 3.8    | 33.3 $\pm$ 4.7   | 36.4 $\pm$ 1.1   | 24.6 $\pm$ 4.7   |
| PTF               | 18             | 47.4 $\pm$ 3.9a   | 40.8 $\pm$ 2.6ab | 30.3 $\pm$ 5.2b  | 10.96 $\pm$ 1.5c |
| PSF               | 16             | 17.9 $\pm$ 4.4    | 13.5 $\pm$ 1.1   | 14.6 $\pm$ 2.9   | 11.2 $\pm$ 0.95  |
| LILY              | 8              | 14.7 $\pm$ 5.3a   | 11.4 $\pm$ 0.7ab | 4.0 $\pm$ 0.6bc  | 0.98 $\pm$ +0.1c |
| LEGU              | 9              | 3.6 $\pm$ 1.5     | 3.6 $\pm$ 2.6    | 3.3 $\pm$ 2.1    | 1.5 $\pm$ 0.2    |
| ABP               | 11             | 0.7 $\pm$ 0.4b    | 0.98 $\pm$ 0.4ab | 0.43 $\pm$ 0.07b | 2.2 $\pm$ 0.57a  |
| SHR               | 3              | 1.2 $\pm$ 0.4b    | 4.4 $\pm$ 1.2a   | 5.6 $\pm$ 0.09a  | 4.8 $\pm$ 1.3a   |
| Total             | 78             |                   |                  |                  |                  |

<sup>a,b,c</sup> Means in the same row with different superscript are significantly different. NG: No grazing, LG: Light grazing, MG: Moderate grazing, HG: Heavy grazing. PTG= Perennial tall grass, PSG= Perennial short grass, PTF= Perennial tall forbs, PSF= Perennial short forbs, LILY= Liliaceae herb, LEGU= legumes, ABP= annual/biennial plants and SHR= shrubs.

With grazing intensity, the decrease of dominance species was higher in PTG and PTF (3.85%), while the PSG and PSF dominant species increased with grazing intensity 3.85% and 8.97% respectively (Table3). Most of the C4 photosynthetic pathway dominant species appeared in PTF (5.13%) and PSF (2.56%). About 17.94% of the total grassland species showed a positive reaction to grazing intensity by increasing their aboveground biomass (Table 3), while 16.66% showed a negative response to grazing intensity by decreasing their aboveground biomass.

192

193

194

195

196 **Table 3.** Proportional increase and decrease in the aboveground biomass and species photosynthetic pathway of plant  
 197 functional groups across different grazing intensities

| Plant functional group | Total species     |       | Decrease          |       | Increase          |       | Photosynthetic pathway |       |    |       |
|------------------------|-------------------|-------|-------------------|-------|-------------------|-------|------------------------|-------|----|-------|
|                        | Number of species | %     | Number of species | %     | Number of species | %     | C3                     | C3%   | C4 | C4%   |
| PTG                    | 6                 | 7.69  | 3                 | 3.85  | -                 | -     | 6                      | 7.69  | -  | -     |
| PSG                    | 7                 | 8.97  | -                 | -     | 3                 | 3.85  | 5                      | 6.41  | 2  | 2.56  |
| PTF                    | 18                | 23.08 | 3                 | 3.85  | 2                 | 2.56  | 14                     | 17.95 | 4  | 5.13  |
| PSF                    | 16                | 20.51 | 2                 | 2.56  | 7                 | 8.97  | 15                     | 19.23 | 1  | 1.28  |
| LILY                   | 8                 | 10.26 | 2                 | 2.56  | -                 | -     | 8                      | 10.26 | -  | -     |
| LEGU                   | 9                 | 11.54 | 2                 | 2.56  | 2                 | 2.56  | 8                      | 10.26 | 1  | 1.28  |
| ABP                    | 11                | 14.1  | 1                 | 1.28  | -                 | -     | 10                     | 12.82 | 1  | 1.28  |
| SHR                    | 3                 | 3.85  | -                 | -     | -                 | -     | 3                      | 3.85  | -  | -     |
| Total                  | 78                | 100   | 13                | 16.66 | 14                | 17.94 | 69                     | 88.47 | 9  | 11.53 |

198 Plant functional groups: PTG= perennial tall grass, PSG= perennial short grass, PTF= perennial tall forbs, PSF= perennial short  
 199 forbs, LILY= liliaceae herb, LEGU= legumes, ABP= annual/biennial plant, SHR= shrubs

200 In this study, a total of 78 species were identified including 13 dominant species (Table 4). These  
 201 species generally decreased with increasing grazing intensity. Specifically, we identified four palatable  
 202 species (*Leymus chinensis*, *Bromus inermis*, *Achnatherum sibiricum*, and *Vicia amoena*) and three of them  
 203 belong to the PTG functional group. There were six species with medium palatability (*Astragalus*  
 204 *melilotoides*, *Lilium tenuifolium*, *Veronica incana*, *Galium verum*, *Clematis hexapetla*, and *Thalictrum*  
 205 *petaloideums*) belonging to LEGU, LILY herbs, ABP, and PTF functional groups respectively.

206

207

208



209

210

211

212

213 **Table 4.** Variation of dominant species with high palatability in different plant functional groups across different  
 214 grazing intensities

| <b>Functional group</b> | <b>Species</b>                 | <b>NG<br/>0.00 AU/h</b> | <b>LG<br/>0.23 AU/h</b> | <b>MG<br/>0.46 AU/h</b> | <b>HG<br/>0.92 AU/h</b> |
|-------------------------|--------------------------------|-------------------------|-------------------------|-------------------------|-------------------------|
| PTG                     | <i>Leymus chinensis</i>        | 33.6± 7.2a              | 22.2±2.1b               | 7.9± 2.5c               | 1.7± 0.86d              |
| PTG                     | <i>Bromus inermis</i>          | 2.2± 1.2a               | 1.2± 1.3b               |                         | 0.04± 0.02c             |
| PTG                     | <i>Achnatherum sibiricum</i>   | 0.56± 0.4a              | 0.24± 0.1b              | 0.33± 0.2b              | 0.17± 0.1c              |
| LEGU                    | <i>Astragalus melilotoides</i> | 0.58± 0.3 a             | 0.44± 0.3a              | 0.07± 0.05b             | 0.01± 0.002b            |
| LEGU                    | <i>Vicia amoena</i>            | 0.08± 0.03a             | 0.05± 0.02a             | 0.01± 0.004b            | 0.01± 0.002b            |
| LILY                    | <i>Iris ventricosa</i>         | 4.3 ±2.2a               | 3.6 ±1.2a               | 1.6 ± 0.57b             | 0.19 ± 0.05c            |
| LILY                    | <i>Lilium tenuifolium</i>      | 0.05 ± 0.03a            | 0.03 ±0.003a            | 0.001± 0.001b           | 0.003±0.0002b           |
| ABP                     | <i>Veronica incana</i>         | 0.19 ± 0.11             | 0.19 ± 0.16             | 0.04 ± 0.04             | 0.01 ± 0.004            |
| PSF                     | <i>Heteropappus altaicus</i>   | 2.5 ± 0.94a             | 1.5 ± 0.65b             | 0.3 ± 0.18c             | 0.002 ± 0.001d          |
| PSF                     | <i>Cymbaria dahurica</i>       | 0.7 ± 0.15a             | 0.5 ± 0.21a             | 0.5 ± 0.27a             | 0.1 ± 0.06b             |
| PTF                     | <i>Galium verum</i>            | 0.8 ±0.14a              | 0.8 ± 0.29a             | 0.7 ± 0.28a             | 0.2 ± 0.06b             |
| PTF                     | <i>Clematis hexapetla</i>      | 0.2 ± 0.14a             | 0.07 ± 0.05a            | 0.12 ± 0.08a            | 0.001± 0.0001b          |
| PTF                     | <i>Thalictrumsquarrosom</i>    | 8.9 ± 3.38a             | 8.4 ± 2.95a             | 2.6 ± 0.91b             | 0.69 ± 0.22c            |

215 <sup>a,b,c</sup> Means in the same row with different superscript are significantly different. NG: No grazing, LG: Light grazing, MG:  
 216 Moderate grazing, HG: Heavy grazing. PTG= Perennial tall grass, PSG= Perennial short grass, PTF= Perennial tall forbs, PSF=  
 217 Perennial short forbs, LILY= Liliaceae herb, LEGU= legumes, ABP= annual/biennial plants and SHR= shrubs.

218 Table 5 shows plant functional groups with low to medium palatability. Generally, these plant species  
 219 increase with an increase in grazing intensity.

220

221

222

223

224

225

226 **Table 5.** Variation of dominant species with low and medium palatability in different plant functional groups across  
 227 different grazing intensities

| <b>Functional group</b> | <b>Species</b>                  | <b>NG<br/>0.00 AU/h</b> | <b>LG<br/>0.23 AU/h</b> | <b>MG<br/>0.46 AU/h</b> | <b>HG<br/>0.92 AU/h</b> |
|-------------------------|---------------------------------|-------------------------|-------------------------|-------------------------|-------------------------|
| PSG                     | <i>Carex duriuscula</i>         | 12.4 ± 3.5d             | 20.8 ± 3.1c             | 29.6 ± 4.05b            | 42.8 ± 3.5a             |
| PSG                     | <i>Cleistogenes squarrosa</i>   | 1.3 ± 0.66 c            | 3.5 ± 0.76b             | 4.4 ± 1.1b              | 6.2 ± 1.7a              |
| PSG                     | <i>Koeleria cristata</i>        | 0.61± 0.52b             | 0.63 ± 0.20b            | 1.8 ± 0.70a             | 2.02 ± 0.61a            |
| LEGU                    | <i>Astragalus adsurgens</i>     | 0.04 ± 0.033c           | 0.33 ± 0.15b            | 0.58 ± 0.17a            | 0.98 ± 0.25a            |
| LEGU                    | <i>Oxytropis myriophylla</i>    | 0.04 ± 0.04c            | 0.02 ± 0.001c           | 0.13 ± 0.09b            | 1.0 ± 0.44a             |
| PSF                     | <i>Pulsatilla turczaninovii</i> | 4.3 ± 0.97b             | 4.3 ± 0.81b             | 7.6 ± 1.2a              | 7.1±1.3a                |
| PSF                     | <i>Potentilla acaulis</i>       | 0.07 ± 0.04c            | 0.73 ± 0.41b            | 1.00 ± 0.6b             | 3.03 ± 1.1a             |
| PSF                     | <i>Potentilla verticillaris</i> | 0.11± 0.01b             | 0.16± 0.07b             | 0.33± 0.16b             | 0.71± 0.13a             |
| PSF                     | <i>Taraxacum mongolicum</i>     | 0.001±0.0001c           | 0.09 ± 0.010b           | 0.09 ± 0.05b            | 1.4 ± 0.5a              |
| PSF                     | <i>Potentilla tanacetifolia</i> | 0.03 ± 0.02b            | 0.09 ± 0.03b            | 0.30 ± 0.20a            | 0.70 ± 0.32a            |
| PSF                     | <i>Sibbaldia adpressa</i>       |                         | 0.04 ± 0.02b            | 0.09 ± 0.07b            | 1.02 ± 0.23a            |
| PTF                     | <i>Artemisia tanacetifolia</i>  | 9.1± 1.47a              | 10.9 ± 2.48a            | 11.7± 2.90a             | 11.3 ± 2.17a            |
| PTF                     | <i>Schizonepeta multifida</i>   | 0.17±0.12 b             | 0.22± 0.07b             | 1.3± 0.5a               | 0.97±0.43 a             |

228 <sup>a,b,c</sup> Means in the same row with different superscript are significantly different. NG: No grazing, LG: Light grazing, MG:  
 229 Moderate grazing, HG: Heavy grazing. PTG= Perennial tall grass, PSG= Perennial short grass, PTF= Perennial tall forbs, PSF=  
 230 Perennial short forbs, LILY= Liliaceae herb, LEGU= legumes, ABP= annual/biennial plants and SHR= shrubs.

231 *Response of functional groups diversity to grazing intensity*

232 Gamma species diversity and its composition (Alpha and Beta) were consistently higher in PTG,

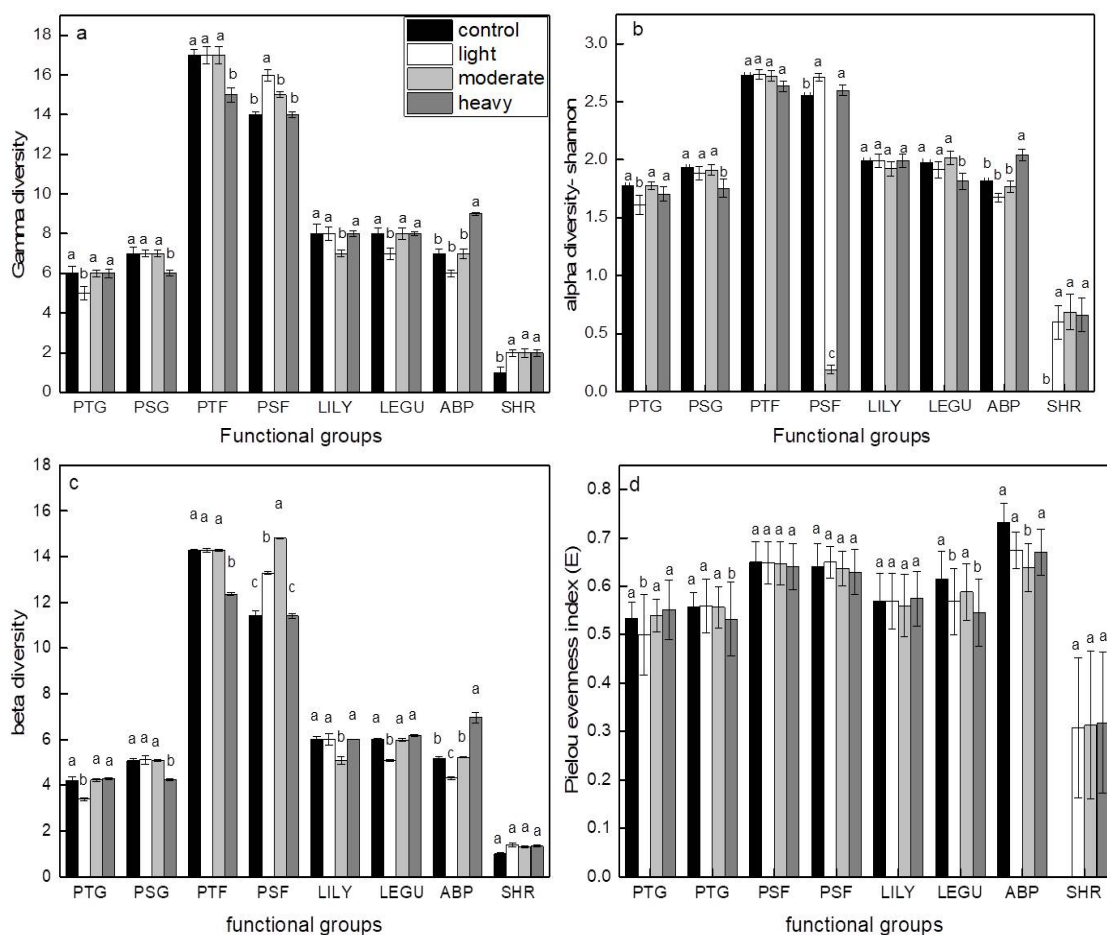

233 LEGU, ABP, SHR, and lower in PSG and PSF (Fig. 2). The contribution of  $\beta$  diversity to gamma diversity  
 234 in Hulunbur grassland is slightly greater than that of  $\alpha$  diversity (Fig. 2b and c). The contribution of  $\alpha$  and  
 235  $\beta$  diversity of the eight PFGs across the grazing intensities to  $\gamma$  diversity was different (Fig. 2a-2c). Species  
 236 diversity was higher in PTF and PSF than other functional groups. The high diversity in PTF and PSF was  
 237 mainly due to the higher number of species richness in these functional groups. We also found a significant  
 238 difference ( $p < 0.05$ ) in Pielou evenness of the eight PFGs across the grazing intensities (Fig. 2d). The  
 239 evenness index was generally higher for PSF and LILY herbs across the grazing intensities, while PTG and  
 240 LEGU recorded the lowest values in the HG treatment.

241 **Fig. 2.** Comparisons of (a) Gamma diversity ( $\gamma$ ), (b) Alpha diversity ( $\alpha$ ), (c) Beta diversity ( $\beta$ ), and (d) Pielou Evenness  
 242 of eight plant functional groups across different grazing intensities in Hulunbur grassland, Inner Mongolia. PTG:  
 243 Perennial tall grass, PSG: Perennial short grass, PTF: Perennial tall forbs, PSF: Perennial short forbs, LILY: Liliaceae  
 244 herb, LEGU: Legume, ABP: Annual/biennial plant, SHR: Shrub. Error bars indicate the standard error ( $\pm$  SE) of the  
 245 mean ( $p \leq 0.05$ ).

246

247

248

## 249 Discussion

250 Livestock grazing may modify plant community structure, thereby leading to changes in vegetation  
251 characteristics. Across the length of the grazing season, several species could grow and become established  
252 within the grazing environment. Our findings demonstrate that species richness was consistently higher  
253 under LG and MG compared with the NG and HG intensities. This may be related to grazing history and  
254 the rate of species disappearance during defoliation in the HG plot (Marty 2005; Noy-Meir, et al. 1989).  
255 The trampling and nibbling effect of cattle led to reduced biomass through the removal of tall species and  
256 consequently result in changes in competitive interactions, which enabled less aggressive species to grow  
257 and hence a higher species richness in the community (Sternberg, et al. 2000). Several studies have  
258 proposed that grazing intensity and biodiversity converge in a general ‘dominance disturbance theory’  
259 (Grime 1979; Sternberg, et al. 2000). Our results on the relationship between grazing intensity and species  
260 richness support this theory. In sum, species richness increased in both LG and MG plots.

261 We found that the effect of LG and MG on species richness did not differ and this may be related to  
262 the presence of grazing tolerant species in the treatments. Species richness was observed to be lower under  
263 HG intensity. There was no visible effect of light grazing during the plant growth period. Transition in  
264 PFGs as a result of grazing intensity has been documented in the literature (Papanikolaou, et al. 2011;  
265 Wang, et al. 2019; Wu, et al. 2014b). Our analysis of functional groups showed a decline in the PTF in the  
266 HG plot only. Similarly, PSGs declined in the NG and HG plots. These results contradicted the earlier  
267 report by (Papanikolaou, et al. 2011) who reported that the richness of both perennial grasses and forbs  
268 increased with grazing intensity. The difference between the former and present study may be related to  
269 vegetation type (Wu, et al. 2014b). However, our result is similar to the findings by (Fernández Alés, et al.  
270 1993). In contrast, shrubs and legumes functional groups were less affected by grazing intensity. Their  
271 persistence is related to the development of chemical and/or physical defense substances such as chemical  
272 secretions and capillaries, as well as the possession of spiny leaves. They are also less dependent on seed  
273 production than other species. This strategy allows for rapid growth and early establishment after the first  
274 rainfall and improves grazing tolerance.

275 Our results showed that the total aboveground biomass of the PFGs decreased with increasing grazing  
276 intensity, and this is consistent with earlier reports (Wang, et al. 2016; Wu, et al. 2014a). Moreover, the  
277 plant composition changed due to the differential response of the PFGs to grazing intensity, which is weaker  
278 at the community level than for individual species based on aboveground biomass. The change in plant

279 community composition is broadly driven by the decline in the biomass of the palatable species (especially  
280 PTG functional groups) and the increase in the aboveground biomass of ABP plants. These results agree  
281 with the previous study by (Sternberg, et al. 2015) that an increase in grazing intensity increases the  
282 dominant species of Gramineae which comprises of the most palatable species of grasses and forbs.  
283 Notably, some functional groups increased (e.g., ABP and SHR) while others decreased (e.g., PTG, PTF,  
284 and LILY) as grazing intensifies. This may be attributed to the higher probability of the tall grasses being  
285 defoliated by the grazing animals, thereby increasing light interception by the understory plants (Pekin, et  
286 al. 2014). Also, the reduction of some functional groups could have increased the competitive ability of  
287 others. In grassland ecosystems, however, dominant species have been reported to exhibit significant  
288 resistance or tolerance to grazing through a series of adaptive mechanisms (e.g., secretion of chemical  
289 defense substances) when the grazing condition changes (Aboling, et al. 2008; Ruppert, et al. 2015).

290 Species with different photosynthetic pathways have a different physiological and ecological response  
291 to grazing (Wang 2002). Animals accidentally eat some plants while they graze. Animals eager for fresh  
292 grass may accidentally bite off the crown of toxic species when they have nothing else to eat. This may  
293 explain the decrease of LILY functional group with grazing intensities

294 Grassland management decisions must, therefore, take seasonal development patterns and grassland  
295 succession into account, both of which are closely related to photosynthetic pathways. In Hulunbuir  
296 grassland, grazing induces the abundance of C4 species at the early succession stage. This is because the  
297 C4 species has the potential to produce a sufficient quantity of seeds that match their high seed dispersal  
298 capacity.

299 In this study, we found only nine species with the C4 photosynthetic pathway, while the majority of  
300 others (67 in total) have C3 pathways. The relatively low quantity of C4 species could be premised on the  
301 relative abundance of species within the eight PFGs. Our results suggested that C4 species are common in  
302 forbs than other PFGs and this corroborates the earlier report by (Wang 2002) that grazing intensity  
303 significantly influenced the abundance of C3 plants in a 4-year trial. Whereas C3 plants decreased with  
304 increasing grazing intensity, we found that the C4 plant increased as grazing intensifies. Simultaneously,  
305 summer temperatures also increased, providing an alternative explanation for the observed increase in C4  
306 plants.

307 In Hulunbuir grassland, the structure and composition of the species change over time and space. Our  
308 results indicated that the species composition and abundance of all the eight PFGs are dynamic, thus, the  
309 different PFGs provide fodders of different quality at the same time of grazing season. (Tserendash and  
310 Erdenebaatar 1993) describes the early summer flowering contents of the species *Koeleria cristata*, *Poa*  
311 *partenis*, and *Agropyron cristatum* in steppe ecosystems. Notably, at the same time of the year, *Carex spp*

312 showed late flowering. More importantly, in the growing season, the feeding C4 plants showed  
313 compensatory growth after grazing.

314 The patterns of species grown under different water ecotype can help us to understand the community  
315 structure, diversity and productivity of temperate grassland (Fay, et al. 2002; Fowler 1986; Köchy and  
316 Wilson 2000; Tsialtas, et al. 2001; Weltzin and McPherson 1997). The dominant species, *Leymus chinensis*,  
317 *Bromus inermis*, *Achnatherum sibiricum* and *Vicia amoena* were relatively higher in grasses and legumes.  
318 In total, 78 plant species belonging to eight functional groups (16.66%) decreased, while 17.94% increased  
319 with grazing intensity. Livestock grazing plays a significant role in plant species diversity and vegetation  
320 composition of grasslands (Cingolani, et al. 2003; Pucheta, et al. 2004). Light and moderate grazing  
321 intensity recorded higher plant species diversity compared with the NG and HG intensity. This implies that  
322 HG intensity resulted in a decrease in the species diversity of Hulunbuir grassland (Kikoti and Mligo 2015).  
323 Further, our results showed a decrease and increase in the palatable (e.g., *Bromus inermis*) and less palatable  
324 (e.g., *Pulsatilla turczaninovii*) species as grazing intensified. This finding concurs with the report by (Ji, et  
325 al. 2020) who reported an increase in the unpalatable aboveground biomass in total aboveground biomass  
326 with increasing grazing intensity. Also, the observed trend can be attributed to the selective defoliation of  
327 palatable species by the grazing animals (Liu, et al. 2015; Venter, et al. 2019) which leads to a decline in  
328 competition for resources (Ma, et al. 2019) and this was more evident in the HG plot.

329 The intensity of grazing is a key determinant of the spatio-temporal pattern of grassland resource  
330 utilization by livestock. The impact of grazing on plant species diversity can also be explained relative to  
331 individual species' responses because of the variation in plants resistance and tolerance to grazing.  
332 Specifically, *Leymus chinensis* and *Achnatherum sibiricum* which were palatable species accounted for the  
333 highest important value of biomass in the NG plot. With increasing grazing density, *Leymus chinensis*  
334 gradually decreased due to preferential selection by the grazing animals (Liu, et al. 2016), hence, it  
335 represents the lowest value of aboveground biomass among the dominant species in the HG treatment. As  
336 grazing intensifies, *Carex duriuscula* and *pulsatilla turczaninovii* gradually become the dominant species  
337 in the HG plot. Overall, it can be inferred that the response of the aboveground biomass of both the palatable  
338 and less palatable species differ across the grazing intensities adopted in this study.

339 Plant species with different growth and reproductive phenology may have different responses to  
340 grazing intensities across the length of the grazing season. In this study, the response of individual species  
341 to different grazing intensities is different; however, the same number of positive and negative reactions  
342 among different species did not affect plant species richness and diversity. In general, the response of  
343 vegetation to grazing intensity may be strongly dependent on or overridden by vegetation type (Wu, et al.  
344 2014a). Therefore, grazing intensity is the most important grazing management variable affecting the plant  
345 community structure in grassland ecosystems (Hickman, et al. 2004).

346 The contribution of  $\alpha$  and  $\beta$  diversity to  $\gamma$  diversity is the basis of understanding the composition of  
347 biodiversity (Jost 2007; Zhang, et al. 2014). There are different opinions on the relative importance of  $\alpha$   
348 and  $\beta$  diversity as a function of  $\gamma$  diversity. Whereas some researchers hold the view that  $\alpha$  diversity is more  
349 important, others attached a higher value to  $\beta$  diversity while some groups of scholars believe that the two  
350 (i.e.,  $\alpha$  and  $\beta$ ) are of equal importance (Jost 2007; Meynard, et al. 2011). In this study, we found that  $\beta$   
351 diversity contributes to gamma diversity more than  $\alpha$  diversity for all PFGs across the grazing intensity and  
352 that total diversity is greater in species-rich PFGs (e.g., PTG and PSF) than species-poor PFGs (e.g., SHR  
353 and PTF). The relative contribution of  $\alpha$  and  $\beta$  to  $\gamma$  diversity of the grassland community depends on the  
354 extent of species diffusion and ecological heterogeneity (Chiarucci, et al. 2010; Crist and Veech 2006).  
355 Alpha diversity is more important in the community with a homogeneous environment and species with  
356 high diffusion potential, while  $\beta$  diversity is more important in the community with a heterogeneous  
357 environment and species with weak diffusion potential. The observed increased in diversity of the  
358 functional groups may be attributed to species richness and this strengthens the high diversity recorded in  
359 species-rich functional groups. The results of the functional group diversity recorded across the grazing  
360 intensities were consistent with those reported earlier (Carlson 2011; Harrison, et al. 2003; Schultz, et al.  
361 2011). The differences in the evenness of the PFGs in the various grazing intensity treatments depends on  
362 the difference between the PFGs (Stirling and Wilsey 2001). Because species evenness index and richness  
363 might respond differently to different grazing intensity and environmental variables, we found different  
364 responses of plant functional groups to evenness. The grazing density had differential impact on diversity,  
365 even though 78 plant species were included in every season.

## 366 Conclusions

367 In this study, various sensitive indices of long-term grazing were set and evaluated. Grazing intensity  
368 had a different effect on (change vegetation composition) depends on the productivity and plant functional  
369 groups of grassland communities. There was a significant negative effect of grazing intensity on the  
370 aboveground biomass (AGB). Therefore, the grazing intensity levels are inverted the grazing pressure from  
371 non-grazing to heavy grazing intensity. AGB can be used as a potential sensitive index for meadow  
372 productivity. In this study, LG and HG represent the best and worst responses of aboveground biomass to  
373 grazing, respectively. We found that the richness of the PFGs only differed for PSG and LILY across the  
374 grazing intensities. Perennial short grass species were higher in the LG and MG plots. The PTG showed  
375 significantly decreased with grazing intensity, while PSG increased with grazing intensity. Also, this study  
376 showed that the effect of grazing density on grassland diversity was consistently higher in tall herbaceous  
377 (PTG, LEGU, ABP, SHR) and lower in short herbaceous (PSG and PSF).

378           The results of this study considerably contribute to the sustainable management of grassland resources  
379 in the study area. In addition, the results provide a perspective for evaluating current grazing management  
380 scenarios and carrying out timely adaptive practices, so as to maintain the ability of the grassland system  
381 to perform its ecological functions in the long term.

382  
383

## 384 **Funding**

385 This research was supported by the national key research and development program (2016YFC0500608,  
386 2016YFC0500601), the Natural Science Foundation (31971769), the basic research fund of central non-  
387 profit scientific institutions (161013209031, Y2019YJ13, Y2020YJ19), and the special fund of modern  
388 agricultural technology system of the Chinese ministry of agriculture (CARS-34) and Hulunbuir Science  
389 and Technology Project (YYYYFHZ201903).

## 390 **Acknowledgments**

391 We thank the staff of Hulunbuir Grassland Ecosystem Research Station for their assistance during field  
392 sampling, and our colleagues from the Agricultural Resources and Regional Planning Institute for helping  
393 us to make these figures.

## 394 **Author Contributions**

395 Conceptualization, Y.M.Z and X.X; Main analysis, Y.M.Z, A.I.A and C.J; Visualization, Y.M.Z and R.Y.;  
396 Writing original draft, Y.M.Z and J.S.O; Supervision, X.X and R.Y; Funding and project administration,  
397 X.X; Writing: draft editing and Review, X.X and R.Y; Y.M.Z, R.Y, and A.I.A authors have been equally  
398 contributed in this paper; all authors have read and agreed to the published version of the manuscript.

## 399 **Conflicts Of Interest**

400 The authors declare no conflict of interest.

401  
402

## 403 **References**

404 Aboling, S., et al.2008.Effects of cattle grazing timing and intensity on soil seed banks and  
405 regeneration strategies in a Mediterranean grassland. *Community Ecology* 9(1):97-106.  
406 Bakker, Jan P.1998.The impact of grazing on plant communities. *In* *Grazing and conservation*



- 407 management. Pp. 137-184: Springer.
- 408 Bergmeier, Erwin, Freiburg Dimopoulos, and Panayotis Dimopoulos.2003 .The vegetation of  
409 islets in the Aegean and the relation between the occurrence of islet specialists, island  
410 size, and grazing. *Phytocoenologia* 33(2-3):447-474.
- 411 Carlson, Amanda 2011.Effects of grazing on native plant abundance and diversity in a California  
412 grassland invaded by *Phalaris aquatica*. *Grazing and Native vegetation*:1-21.Chiarucci,  
413 Alessandro, et al.2010Additive partitioning as a tool for investigating the flora diversity in  
414 oceanic archipelagos. *Perspectives in Plant Ecology, Evolution and Systematics* 12(2):83-  
415 91.
- 416 Cingolani, Ana M., et al.2003. Combined effects of environment and grazing on vegetation  
417 structure in Argentine granite grasslands. *Journal of Vegetation Science* 14(2):223-232.
- 418 Crist, T. O., and J. A. Veech, 2006.Additive partitioning of rarefaction curves and species-area  
419 relationships: unifying alpha-, beta- and gamma-diversity with sample size and habitat  
420 area. *Ecol Lett* 9(8):923-32.
- 421 De Bello, Francesco, Jan Lepš, and Maria-Teresa Sebastià 2006.Variations in species and  
422 functional plant diversity along climatic and grazing gradients. *Ecography* 29(6):801-810.
- 423 DÍAz, Sandra, et al. 2007.Plant trait responses to grazing ? a global synthesis. *Global Change*  
424 *Biology* 13(2):313-341.
- 425 Díaz, Sandra, Imanuel Noy-Meir, and Marcelo Cabido 2001.Can grazing response of herbaceous  
426 plants be predicted from simple vegetative traits? *Journal of Applied Ecology* 38(3):497-  
427 508.
- 428 Dumont, Bertrand, et al. 2009. How does grazing intensity influence the diversity of plants and  
429 insects in a species-rich upland grassland on basalt soils? *Grass and Forage Science*  
430 64(1):92-105.
- 431 Facelli, José M., and Heather Springbett 2009. Why do some species in arid lands increase under  
432 grazing? Mechanisms that favour increased abundance of *Maireana pyramidata* in  
433 overgrazed chenopod shrublands of South Australia. *Austral Ecology* 34(5):588-597.
- 434 Fanselow, Nicole, et al. 2011.Short-term regrowth responses of four steppe grassland species to  
435 grazing intensity, water and nitrogen in Inner Mongolia. *Plant and Soil* 340(1-2):279-  
436 289.
- 437 Fay, Philip A., et al. 2002. Altered rainfall patterns, gas exchange, and growth in grasses and

- 438 forbs. *International Journal of Plant Sciences* 163(4):549-557.
- 439 Fernández Alés, R., J. M. Laffarga, and F. Ortega 1993. Strategies in Mediterranean grassland  
440 annuals in relation to stress and disturbance. *Journal of Vegetation Science* 4(3):313-322.
- 441 Foggin, J. Marc 2008. Depopulating the Tibetan grasslands. *Mountain Research and*  
442 *Development* 28(1):26-31.
- 443 Fowler, Norma L. 1986. Microsite requirements for germination and establishment of three grass  
444 species. *American Midland Naturalist*:131-145.
- 445 Grime, John Philip 1979. Plant strategies and vegetation processes. *Plant strategies and*  
446 *vegetation processes*.
- 447 Harrison, S., B. D. Inouye, and H. D. Safford 2003. Ecological heterogeneity in the effects of  
448 grazing and fire on grassland diversity. *Conservation Biology* 17(3):837-845.
- 449 Heady, Harold F. 1964. Palatability of herbage and animal preference. *Rangeland Ecology &*  
450 *Management/Journal of Range Management Archives* 17(2):76-82.
- 451 Hickman, Karen R., et al. 2004. Grazing management effects on plant species diversity in  
452 tallgrass prairie. *Rangeland Ecology and Management* 57(1):58-65.
- 453 Hill, Mark O. 1973. Diversity and evenness: a unifying notation and its consequences. *Ecology*  
454 54(2):427-432.
- 455 Ji, Lei, et al. 2020. Impacts of livestock grazing on vegetation characteristics and soil chemical  
456 properties of alpine meadows in the eastern Qinghai-Tibetan Plateau. *Ecoscience*  
457 27(2):107-118.
- 458 Jost, Lou 2007. Partitioning diversity into independent alpha and beta components. *Ecology*  
459 88(10):2427-2439.
- 460 Kikoti, Imani A., and Cosmas Mligo 2015. Impacts of livestock grazing on plant species  
461 composition in montane forests on the northern slope of Mount Kilimanjaro, Tanzania.  
462 *International Journal of Biodiversity Science, Ecosystem Services & Management* 11(2):114-  
463 127.
- 464 Köchy, Martin, and Scott D. Wilson 2000. Competitive effects of shrubs and grasses in prairie.  
465 *Oikos* 91(2):385-395.

- 466 Le, C., et al. 2014. Grassland degradation caused by tourism activities in Hulunbuir, Inner  
467 Mongolia, China, 2014. Vol. 18, pp. 012137. IOP Publishing.
- 468 Liu, Chen, et al. 2016. Effects of grazing on soil nitrogen spatial heterogeneity depend on  
469 herbivore assemblage and pre-grazing plant diversity. *Journal of Applied Ecology*  
470 53(1):242-250.
- 471 Liu, Jun, et al. 2015. Impacts of grazing by different large herbivores in grassland depend on  
472 plant species diversity. *Journal of Applied Ecology* 52(4):1053-1062.
- 473 Ma, Qingqing, et al. 2019. Quantifying grazing intensity using remote sensing in Alpine  
474 Meadows on Qinghai-Tibetan plateau. *Sustainability* 11(2):417.
- 475 Ma, W., et al. 2010. Changes in individual plant traits and biomass allocation in alpine meadow  
476 with elevation variation on the Qinghai-Tibetan Plateau. *Sci China Life Sci* 53(9):1142-  
477 51.
- 478 Marty, Jaymee T. 2005. Effects of Cattle Grazing on Diversity in Ephemeral Wetlands.  
479 *Conservation Biology* 19(5):1626-1632.
- 480 McIntyre, S., et al. 1999. Disturbance response in vegetation—towards a global perspective on  
481 functional traits. *Journal of vegetation Science* 10(5):621-630.
- 482 Meynard, Christine N., et al. 2011. Beyond taxonomic diversity patterns: how do  $\alpha$ ,  $\beta$  and  $\gamma$   
483 components of bird functional and phylogenetic diversity respond to environmental  
484 gradients across France? *Global Ecology and Biogeography* 20(6):893-903.
- 485 Montalvo, J., et al. 1993. Species diversity patterns in Mediterranean grasslands. *Journal of*  
486 *Vegetation Science* 4(2):213-222.
- 487 Noy-Meir, I., M. Gutman, and Y. Kaplan 1989. Responses of Mediterranean grassland plants to  
488 grazing and protection. *The journal of Ecology*:290-310.
- 489 Olf, Han, and Mark E. Ritchie 1998 Effects of herbivores on grassland plant diversity. *Trends in*  
490 *Ecology & Evolution* 13(7):261-265.
- 491 Papanikolaou, Alexandra D., et al. 2011. Grazing effects on plant functional group diversity in  
492 Mediterranean shrublands. *Biodiversity and Conservation* 20(12):2831-2843.
- 493 Pekin, Burak K., et al. 2014. Ungulate browsing maintains shrub diversity in the absence of

- 494 episodic disturbance in seasonally-arid conifer forest. *PloS one* 9(1):e86288.
- 495 Proulx, Marc, and Asit Mazumder 1998. Reversal of grazing impact on plant species richness in  
496 nutrient-poor vs. nutrient-rich ecosystems. *Ecology* 79(8):2581-2592.
- 497 Pucheta, Eduardo, et al. 2004. Below-ground biomass and productivity of a grazed site and a  
498 neighbouring ungrazed enclosure in a grassland in central Argentina. *Austral Ecology*  
499 29(2):201-208.
- 500 Ruppert, J. C., et al. 2015. Quantifying drylands' drought resistance and recovery: the importance  
501 of drought intensity, dominant life history and grazing regime. *Glob Chang Biol*  
502 21(3):1258-70.
- 503 Saccone, Patrick, et al. 2014. Environmental perturbation, grazing pressure and soil wetness  
504 jointly drive mountain tundra toward divergent alternative states. *Journal of Ecology*  
505 102(6):1661-1672.
- 506 Schultz, Nick L., John W. Morgan, and Ian D. Lunt 2011. Effects of grazing exclusion on plant  
507 species richness and phytomass accumulation vary across a regional productivity  
508 gradient. *Journal of Vegetation Science* 22(1):130-142.
- 509 Sepkoski Jr, J. John 1988. Alpha, beta, or gamma: where does all the diversity *Paleobiology*:221-  
510 234.
- 511 Sternberg, M., et al. 2015. Testing the limits of resistance: a 19-year study of Mediterranean  
512 grassland response to grazing regimes. *Glob Chang Biol* 21(5):1939-50.
- 513 Sternberg, Marcelo, et al. 2000. Vegetation response to grazing management in a Mediterranean  
514 herbaceous community: a functional group approach. *Journal of Applied Ecology*  
515 37(2):224-237.
- 516 Stirling, Gray, and Brian Wilsey 2001. Empirical relationships between species richness,  
517 evenness, and proportional diversity. *The American Naturalist* 158(3):286-299.
- 518 Suding, Katharine N., et al. 2008. Scaling environmental change through the community-level: a  
519 trait-based response-and-effect framework for plants. *Global Change Biology*  
520 14(5):1125-1140.
- 521 Thomas, Haydn J. D., et al. 2019. Traditional plant functional groups explain variation in  
522 economic but not size-related traits across the tundra biome. *Global ecology and*  
523 *biogeography* 28(2):78-95.
- 524 Tserendash, S., and B. Erdenebaatar 1993. Performance and management of natural pasture in

- 525 Mongolia. Nomadic Peoples:9-15.
- 526 Tsialtas, J. T., et al.2001. Interspecific variation in potential water-use efficiency and its relation  
527 to plant species abundance in a water-limited grassland. *Functional Ecology* 15(5):605-  
528 614.
- 529 Venter, Zander S., Heidi-Jayne Hawkins, and Michael D. Cramer 2019.Cattle don't care: Animal  
530 behaviour is similar regardless of grazing management in grasslands. *Agriculture,*  
531 *Ecosystems & Environment* 272:175-187.
- 532 Verdú, José R., et al.2007.Grazing promotes dung beetle diversity in the xeric landscape of a  
533 Mexican Biosphere Reserve. *Biological Conservation* 140(3-4):308-317.
- 534 Wang, Jianxun, et al.2016.Response of plant functional traits to grazing for three dominant  
535 species in alpine steppe habitat of the Qinghai–Tibet Plateau, China. *Ecological*  
536 *Research* 31(4):515-524.
- 537 Wang, R. Z. 2002. Photosynthetic pathway types of forage species along grazing gradient from  
538 the Songnen grassland, Northeastern China. *Photosynthetica* 40(1):57-61.
- 539 Wang, Suizi, et al. 2019. Effects of grazing exclusion on biomass growth and species diversity  
540 among various grassland types of the Tibetan Plateau. *Sustainability* 11(6):1705.
- 541 Weltzin, Jake F., and Guy R. McPherson 1997. Spatial and temporal soil moisture resource  
542 partitioning by trees and grasses in a temperate savanna, Arizona, USA. *Oecologia*  
543 112(2):156-164.
- 544 Whittaker, Robert H.1972. Evolution and measurement of species diversity. *Taxon* 21(2-3):213-  
545 251.
- 546 Whittaker, Robert H., and Whittaker Rh 1977. Evolution of species diversity in lan communities.
- 547 Wilson, Laurel R., et al. 2016.Plant community response to regional sources of dominant grasses  
548 in grasslands restored across a longitudinal gradient. *Ecosphere* 7(4):e01329.
- 549 Wu, Gao-Lin, et al. 2014a. Above- and Belowground Response along Degradation Gradient in  
550 an Alpine Grassland of the Qinghai-Tibetan Plateau. *CLEAN - Soil, Air, Water*  
551 42(3):319-323.
- 552 Wu, Jianshuang, et al. 2014b. Effects of grazing exclusion on plant functional group diversity of  
553 alpine grasslands along a precipitation gradient on the northern Tibetan Plateau. *Arctic,*  
554 *antarctic, and alpine research* 46(2):419-429.

- 555 Yan, Y., and X. Lu 2015. Is grazing exclusion effective in restoring vegetation in degraded  
556 alpine grasslands in Tibet, China? PeerJ 3:e1020.
- 557 Zhang, Q., et al. 2014. Alpha, beta and gamma diversity differ in response to precipitation in the  
558 Inner Mongolia grassland. PLoS One 9(3):e93518.
- 559
